# What would it take to describe the global diversity of parasites?

Colin J. Carlson<sup>a,b,†</sup>, Tad A. Dallas<sup>c</sup>, Laura W. Alexander<sup>d</sup>, Alexandra L. Phelan<sup>b,e</sup> and Anna J. Phillips<sup>f</sup>

<sup>a</sup>*Department of Biology, Georgetown University, Washington, D.C. 20057, U.S.A.*

<sup>b</sup>*Center for Global Health Science & Security, Georgetown University, Washington, D.C., USA.*

<sup>c</sup>*Centre for Ecological Change, University of Helsinki, 00840 Helsinki, Finland*

<sup>d</sup>*Department of Integrative Biology, University of California, Berkeley, CA, U.S.A.*

<sup>e</sup>*O'Neill Institute for National & Global Health Law, Georgetown University Law Center, Washington, D.C.*

<sup>f</sup>*Department of Invertebrate Zoology, National Museum of Natural History, Smithsonian Institution, Washington, D.C. 20013, U.S.A.*

<sup>†</sup>*Correspondence should be directed to [cjc322@georgetown.edu](mailto:cjc322@georgetown.edu).*

Submitted to *Ecology Letters* on July 2, 2020

## Abstract

How many parasites are there on Earth? Here, we use helminth parasites to highlight how little is known about parasite diversity, and how insufficient our current approach will be to describe the full scope of life on Earth. Using the largest database of host-parasite associations and one of the world's largest parasite collections, we estimate a global total of roughly 100,000 to 350,000 species of helminth endoparasites of vertebrates, of which 85% to 95% are unknown to science. The parasites of amphibians and reptiles remain the most poorly described, but the majority of undescribed species are likely parasites of birds and bony fish. Missing species are disproportionately likely to be smaller parasites of smaller hosts in undersampled countries. At current rates, it would take centuries to comprehensively sample, collect, and name vertebrate helminths. While some have suggested that macroecology can work around existing data limitations, we argue that patterns described from a small, biased sample of diversity aren't necessarily reliable, especially as host-parasite networks are increasingly altered by global change. In the spirit of moonshots like the Human Genome Project and the Global Virome Project, we consider the idea of a Global Parasite Project: a global effort to transform parasitology and inventory parasite diversity at an unprecedented pace.

# 1 Introduction

Parasitology is currently trapped between apparently insurmountable data limitations and the urgent need to understand how parasites will respond to global change. Parasitism is arguably the most species-rich mode of animal life on Earth (1; 2; 3), and parasites likely comprise a majority of the undescribed or undiscovered species left to modern science. (2; 4) In recent years, the global diversity and distribution of parasite richness has become a topic of particular concern (5; 6; 1), both in light of the accelerating rate of disease emergence in wildlife, livestock, and humans (7), and growing recognition of the ecological significance of many parasites. (8) Parasitic taxa are expected to face disproportionately high extinction rates in the coming century, causing a cascade of unknown but possibly massive ecological repercussions. (5; 9) Understanding the impacts of global change relies on baseline knowledge about the richness and biogeography of parasite diversity, but some groups are better studied than others. Emerging and potentially-zoonotic viruses dominate this field (10; 11; 12; 13; 14); macroparasites receive comparatively less attention.

Despite the significance of parasite biodiversity, the actual richness of most macroparasitic groups remains uncertain, due to a combination of underlying statistical challenges and universal data limitations for symbiont taxa. Particularly deserving of reassessment are helminth parasites (hereafter helminths), a polyphyletic group of parasitic worms including, but not limited to, the spiny-headed worms (acanthocephalans), tapeworms (cestodes), roundworms (nematodes), and flukes (trematodes). Helminth parasites exhibit immense diversity, tremendous ecological and epidemiological significance, and a wide host range across vertebrates, invertebrates, and plants. Estimates of helminth diversity remain controversial (1; 2; 15), especially given uncertainties arising from the small fraction of total diversity described so far (4). Though the task of describing parasite diversity has been called a “testimony to human inquisitiveness” (1), it also has practical consequences for the global task of cataloging life; one recent study proposed there could be 80 million or more species of nematode parasites of arthropods, easily reaffirming the Nematoda as a contender for the most diverse phylum on Earth. (2)

With the advent of metagenomics and bioinformatics, and the increasing digitization of natural history collections, funders are becoming interested in massive “moonshot” endeavors to catalog global diversity. Last year, the Global Virome Project was established with the stated purpose of cataloging 85% of viral diversity within vertebrates (particularly mammals and birds, which host almost all emerging zoonoses), with an investment of \$1.2 billion over 10 years. Whereas the Global Virome Project is ultimately an endeavor to prevent the future emergence of the highest-risk potential zoonoses—the natural evolution of decades of pandemic-oriented work at the edge of ecology, virology, and epidemiology—we suggest parasitologists have the opportunity to set a more inclusive goal. Between a quarter and half of named virus species can infect humans (14), while human helminthiasis are a small, almost negligible fraction of total parasite diversity despite their massive global health burden. The need to understand global parasite diversity reflects a more basic set of questions about the world we live in, and

75 the breadth of life within it.

76 Here we ask, what it would take to completely describe global helminth diversity in  
77 vertebrates? The answer is just as dependent on how many helminth species exist as  
78 it is on the rate and efficiency of parasite taxonomic description efforts. We set out to  
79 address three questions:

80 I. What do we know about the global process of describing and documenting parasite  
81 biodiversity, and how will it change in the future?

82 II. How many helminth species should we expect globally, and how much of that  
83 diversity is described?

84 III. How many years are we from describing all of global parasite diversity, and what  
85 can (and can't) we do with what we have?

86 From there, we make recommendations about where the next decade of parasite system-  
87 atics and ecology might take us.

## 88 2 The data

89 To answer all three questions, we take advantage of two collections-based datasets that  
90 have been made available in the last decade (Figure 1). The biological collections housed  
91 at museums, academic research institutions, and various private locations around the  
92 world are one of the most significant “big data” sources for biodiversity research (16),  
93 especially for parasites. (17; 18) The Natural History Museum in London, UK (NHM)  
94 curates the Host-Parasite Database, which includes regional lists of helminth-host associ-  
95 ations, including full taxonomic citations for helminth species. (19; 20) By species counts  
96 alone, the NHM dataset is perhaps the largest species interaction dataset published so  
97 far in ecological literature. (6) In our updated scrape of the web interface, which will  
98 be the most detailed version of the dataset ever made public, there are a raw total of  
99 109,060 associations recorded between 25,740 helminth species (including monogeneans)  
100 and 19,097 hosts (vertebrate and invertebrate).

101 The U.S. National Parasite Collection (USNPC) is one of the largest parasite col-  
102 lections in the world, and is one of the most significant resources used by systematists  
103 to discover, describe, and document new species (17; 21). The published records consti-  
104 tute the largest open museum collection database for helminths, especially in terms of  
105 georeferenced data availability (5). Here, we use a recent copy of the USNPC database  
106 that includes 89,580 specimen records, including 13,426 species recorded in the groups  
107 Acanthocephala, Nematoda, and Platyhelminthes. (Of these we assume the vast ma-  
108 jority are vertebrate parasites.) In combination, the two datasets represent the growing  
109 availability of big data in parasitology, and allow us to characterize parasite diversity  
110 much more precisely than we could have a decade ago.

### 111 3 How does parasite biodiversity data accumulate?

112 Describing the global diversity of parasites involves two major processes: document-  
113 ing and describing diversity through species descriptions, geographic distributions, host  
114 associations, etc.; and consolidating and digitizing lists of valid taxonomic names and  
115 synonyms (e.g. ITIS, Catalogue of Life, WoRMS). Both efforts are important, time-  
116 consuming, and appear especially difficult for parasites.

#### 117 3.1 Why has helminth diversity been so difficult to catalogue?

118 The most obvious reason is the hyperdiversity of groups like the Nematoda, but this  
119 only tells part of the story. Other hyperdiverse groups, like the sunflower family (Aster-  
120 aceae), have far more certain richness estimates (and higher description rates) despite  
121 being comparably speciose. Several hypotheses are plausible: surveys could be poorly  
122 optimized for the geographic and phylogenetic distribution of helminth richness, or re-  
123 maining species might be objectively harder to discover and describe than known ones  
124 were. Perhaps the most popular explanation is that taxonomists' and systematists'  
125 availability might be the limiting factor (22; 23); the process of describing helminth  
126 diversity relies on the dedicated work of systematic biologists, and the availability and  
127 maintenance of long-term natural history collections. However, Costello *et al.* (24) ob-  
128 served that the number of systematists describing parasites has increased steadily since  
129 the 1960s, with apparently diminishing returns. Costello posited this was evidence the  
130 effort to describe parasites has reached the "inflection point," with more than half of  
131 all parasites described; this assessment disagrees noticeably with many others in the  
132 literature. (23)

#### 133 3.2 Have we actually passed the inflection point?

134 No, probably not. We show this by building species accumulation curves over time, from  
135 two different sources: the dates given in taxonomic authority citations in the NHM data,  
136 and the date of first accession in the USNPC data, for each species in the dataset (Figure  
137 1). Both are a representation of total taxonomic effort, and vary substantially between  
138 years. Some historical influences are obvious, such as a drop during World War II (1939-  
139 1945). Recently the number of parasites accessioned has dropped slightly, but it seems  
140 unlikely (especially given historical parallels) that this reflects a real inflection point in  
141 parasite sampling, and is probably instead reflects a limitation of the data structure; the  
142 NHM data in particular has not been updated since 2013. Despite interannual variation,  
143 the accumulation curves both demonstrate a clear cut pattern: sometime around the turn  
144 of the 20th century, they turn upward and increase linearly. Since 1897, an average of  
145 163 helminth species have been described annually ( $R^2 = 0.991$ ,  $p < 0.001$ ), while an  
146 average of 120 species are added to collections every year since 1899 ( $R^2 = 0.998$ ,  $p <$   
147  $0.001$ ). The lack of slowing down in those linear trends is a strong indicator that we  
148 remain a long way from a complete catalog of helminth diversity.

### 149 3.3 Are we looking in the wrong places?

150 An alternate explanation for the slow rate of parasite discovery is that the majority  
 151 of parasite diversity is in countries where sampling effort is lower, and *vice versa* most  
 152 sampling effort and research institutions are in places with more described parasite  
 153 fauna (25). Recent evidence suggests species discovery efforts so far have been poorly  
 154 optimized for the underlying—but mostly hypothetical—richness patterns of different  
 155 helminth groups. (25; 26) Ecologists have started to ask questions that could help  
 156 optimize sampling: do parasites follow the conventional latitudinal diversity gradient?  
 157 Are there unique hotspots of parasite diversity, or does parasite diversity peak in host  
 158 biodiversity hotspots? (27; 6; 1; 25; 28; 29) But our ability to answer these types of  
 159 questions is predicated on our confidence that observed macroecological patterns in a  
 160 small (and uncertain) percentage of the world’s helminths are representative of the whole.

### 161 3.4 Are species described later qualitatively different?

162 If helminth descriptions have been significantly biased by species’ ecology, this should  
 163 produce quantitative differences between the species that have and haven’t yet been  
 164 described. We examine two easily intuited sources of bias: body size (larger hosts and  
 165 parasites are better sampled) and host specificity (generalist parasites should be detected  
 166 and described sooner). We found a small but highly significant trend of decreasing body  
 167 size for both hosts and parasites, suggesting the existence of a sampling bias, but not  
 168 necessarily suggesting unsampled species should be massively different. (Figure 2) For  
 169 host specificity, we find an obvious pattern relative to description rates, though less so  
 170 for collections data. (Figure 3) The inflection point around 1840 is likely a byproduct  
 171 of the history of taxonomy, as the *Series of Propositions for Rendering the Nomencla-*  
 172 *ture of Zoology Uniform and Permanent*—now the International Code for Zoological  
 173 Nomenclature—was first proposed in 1842, leading to a standardization of host nomen-  
 174 clature and consolidation of the proliferation of multiple names for single species.

175 The temporal trend also likely reflects the history of taxonomic revisions, as the  
 176 first species reported in a genus tends to have a higher range of hosts, morphology, and  
 177 geography, while subsequent revisions parse these out into more appropriate, narrower  
 178 descriptions. Using the NHM data, we can easily show that the first species reported  
 179 in every genus (usually the type species but not always, given incomplete sampling)  
 180 generally has significantly higher reported numbers of hosts (Wilcoxon rank sum test:  
 181  $W = 22,390,629, p < 0.001$ ; Figure 3). This is because type species often become  
 182 umbrella descriptors that are subsequently split into more species after further investi-  
 183 gation, each with only a subset of the initial total host range. Based on our results, we  
 184 can expect undescribed species of helminths to be disproportionately host-specific.

## 4 How many helminths?

### 4.1 How do we count parasites?

For many groups of parasites, the number of species known to science is still growing exponentially, preventing estimation based on the asymptote of sampling curves. (30) In some cases, there are workarounds: for example, the diversity of parasitoid wasps (Hymenoptera: Braconidae) has been estimated based on the distribution of taxonomic revisions rather than descriptions. (31) But for helminths, every major estimate of diversity is based on the scaling between host and parasite richness, a near-universal pattern across spatial scales and taxonomic groups. (32; 33; 6) The scaling of hosts and fully host-specific parasites can be assumed to be linear: for example, every arthropod is estimated to have at least one host-specific nematode. (2) Poulin and Morand (30) proposed an intuitive correction for generalists:

$$\hat{P} = \frac{\text{per-species parasite richness}}{\text{host breadth}} \hat{H} \quad (1)$$

Poulin and Morand (30) compiled independently-sourced estimates of host specificity and per-species richness, and the resulting estimate of ~75,000 to 300,000 helminth species was canon for a decade. (1) However, Strona and Fattorini (15) used the NHM data to show that subsampling a host-parasite network approximately generates power law scaling, not linear scaling, which reduced estimates by of helminth diversity (in helminth and vertebrate taxon pairs) by an average of 58%. However, they made no overall corrected estimate of helminth diversity in vertebrates.

### 4.2 What do we know now that we didn't before?

Examining bipartite host-affiliate networks across several types of symbiosis, including the vertebrate-helminth network (from the NHM data), we previously found approximate power law behavior in every scaling curve. (14) The underlying reasons for this pattern are difficult to ascertain, and may or may not be connected to approximate power-law degree distributions in the networks. Regardless, the method seems to work as a tool for estimating richness; using the new R package `codependent` (34), we used these tools to show that viral diversity in mammals is probably only about 2-3% of the estimates generated with linear extrapolation by the Global Virome Project. (14) Here, we build on this work by showing how association data can be used to estimate the proportion of overlap among groups, and thereby correct when adding together parasite richness sub-totals. (See **Materials and Methods**.)

### 4.3 How many species are there?

Building on previous studies (1; 15), we re-estimated global helminth diversity using `codependent`, a taxonomically-updated version of the NHM dataset, and a new formula for combining parasite richness across groups. (Table 1) In total, we estimated



103,078 species of helminth parasites of vertebrates, most strongly represented by trematodes (44,262), followed by nematodes (28,844), cestodes (23,749), and acanthocephalans (6,223). Using an updated estimate of bony fish richness significantly increased these estimates from previous ones, with over 37,000 helminth species in this clade alone. Birds and fish were estimated to harbor the most helminth richness, but reptiles and amphibians had the highest proportion of undescribed diversity. The best-described groups were nematode parasites of mammals (possibly because so many are zoonotic and livestock diseases) and cestode parasites of the cartilaginous fishes (perhaps due to the expertise of a strong collaborative research community, including the participants in the Planetary Biodiversity Inventory project on cestode systematics). (35)

#### 4.4 Do we trust these estimates?

Although estimates from a decade ago were surprisingly close given methodological differences (1), we now have a much greater degree of confidence in our overall estimate of vertebrate helminth richness. However, some points of remaining bias are immediately obvious. The largest is methodological: by fitting power law curves over host richness, we assumed all hosts had at least one parasite from any given helminth group. While this assumption worked well for mammal viruses, it may be more suspect especially for the less-speciose groups like Acanthocephala. On the other hand, the power law method is prone to overestimation in several ways enumerated in (14). Furthermore, Dallas *et al.* (36) estimated that 20-40% of the host range of parasites is underdocumented in the Global Mammal Parasite Database, a sparser but comparable dataset. If these links were recorded in our data, they would substantially expand the level of host-sharing and cause a reduction of the scaling exponent of power laws, causing lower estimates. On the other hand, if we know that the majority of undescribed parasite diversity is far more host specific than known species, our estimates would severely underestimate in this regard. At present, it is essentially impossible to estimate the sign of these errors once compounded together.

#### 4.5 What about cryptic diversity?

One major outstanding problem is cryptic diversity, the fraction of undescribed species that are genetically distinct but morphologically indistinguishable, or at least so subtly different that their description poses a challenge. Many of the undescribed species could fall in this category, and splitting them out might decrease the apparent host range of most species, further increasing estimates of total diversity. Dobson *et al.* (1) addressed this problem by assuming that the true diversity of helminths might be double and double again their estimate; while this makes sense conceptually, it lacks any data-driven support. The diversity of cryptic species is unlikely to be distributed equally among all groups; for example, long-standing evidence suggests it may be disproportionately higher for trematodes than cestodes or nematodes. (37)

We can loosely correct our overall richness estimates for cryptic diversity. A recently-compiled meta-analysis suggests an average of 2.6 cryptic species per species of acan-

thocephalan, 2.4 per species of cestode, 1.2 per species of nematode, and 3.1 per species of digenean. (38) Using these numbers, we could push our total estimates to at most 22,404 acanthocephalan species, 80,747 cestodes, 63,457 nematodes, and a whopping 181,474 species of trematodes, with a total of 348,082 species of helminths. However, there may be publication bias that favors higher cryptic species rates (or at least, zeros may be artificially rare), making these likely overestimates. Increased sampling will push estimates higher for many species, and eventually will allow a more statistically certain estimate of the cryptic species “multiplication factor” needed to update the estimates we present here.

## 5 Could we describe the world’s parasite diversity?

### 5.1 How long would it take to catalog global helminth diversity?

We estimated 103,079 total helminth species on Earth, of which 13,426 (13.0%) are in the USNPC and 15,817 (15.3%) are in the NHM Database. At the current rates we estimated, it would take 536 years to describe global helminth diversity and catalog at least some host associations (based on the NHM data as a taxonomic reference), and 745 years to add every species to the collection (based on the USNPC). Including the full range of possible cryptic species would push the total richness to 348,082 helminth species (95% undescribed), which would require 2,040 years to describe and 2,779 years to collect.

Even with hypothetical overcorrections, these are daunting numbers: for example, if the NHM only captures one tenth of known helminth diversity, and thereby underestimates the rate of description by an order of magnitude, it would still take two centuries to describe remaining diversity. These estimates are also conservative in several ways: the majority of remaining species will be more host-specific and therefore harder to discover, and the process would almost certainly undergo an asymptote or at least a mild saturating process. Moreover, many of the 13,426 unique identifiers in the USNPC are either currently or may be synonyms of valid names and may be corrected through taxonomic revision and redetermination; previous estimates suggest invalid names may outnumber valid ones, in some data. (24)

### 5.2 Where is the undescribed diversity?

Previous work has argued that current patterns of helminth description are poorly matched to underlying richness patterns, though those patterns are also unknown and assumed to broadly correspond to host biodiversity (25). Here, we used the scaling between host and parasite diversity to predict the “maximum possible” number of parasites expected for a country’s mammal fauna, and compared that to known helminths described from mammals in the NHM dataset (Figure 4). While these estimates are liberal in the sense that they include the global range of parasite fauna associated with given hosts, they are also conservative in that they are uncorrected for cryptic diversity, or the possibility of higher host specificity in the tropics.



We found that helminths were best known in the handful of countries that dominate parasite systematics work (the United States, Australia, Brazil, Canada, China, and some European countries). But even in these places, most species are probably undescribed; many countries have no records at all, including large countries like the Democratic Republic of the Congo that are mammal diversity hotspots. Between 80% and 100% of possible parasite diversity could be locally undescribed for most of the world—high estimates, but plausible given a global undescribed rate of 85–95%. This spatial pattern likely reflects a combination of language and access barriers (data in Chinese and Russian collections, for example, are known to be substantial, but inaccessible to our present work), and a broader inequity arising from the concentration of institutions and researchers in wealthy countries, and the corresponding disproportionate geographic focus of research. (39) Previous research has noted that African parasitology has been especially dominated by foreign researchers (40), and African parasitologists remain particularly underrepresented in Western research societies. (41)

### 5.3 How much can we do with what we have?

Or, to put the question another way: With such a small fraction of parasite diversity described, how confident can we be in macroecological patterns? A parallel problem was encountered by Quicke (42) as part of a longer-term effort to estimate global parasitoid wasp diversity. (43; 31) Only a year after publishing a paper (44) exploring similar macroecological patterns to those we have previously explored (6; 45), Quicke concluded “we know too little” to make conclusions about macroecological patterns like latitudinal trends. (42) For parasitoid wasps, the problem is attributable to a similar set of systemic biases, like underdescription of tropical fauna, or a bias in species description rates towards larger species first.

Given that almost 90% of helminth diversity is undescribed (and closer to 100% is undescribed in many places), parasite ecologists need to approach work with “big data” with a similar degree of caution. Working at the level of ecosystems or narrowly-defined taxonomic groups may help sidestep some of these issues.(28) But at the global level, patterns like a latitudinal diversity gradient could be the consequence of real underlying trends, or just as easily be the consequence of extreme spatial sampling bias in collections and taxonomic descriptions and revisions.

It will take decades or even centuries before datasets improve substantially enough to change our degree of confidence in existing macroecological hypotheses. Given this problem, Poulin (23) recommended abandoning the task of estimating parasite diversity, and assuming parasite richness is determined “simply [by] local host species richness.” However, at global scales, this is not necessarily supported (46); Dallas *et al.* (6) showed that the per-host richness of parasite fauna varied over an order of magnitude across different countries in the NHM data, a spatial pattern with little correlation to mammal biodiversity gradients. Even this result is nearly impossible to disentangle from sampling incompleteness and sampling bias. Moreover, even at mesoscales where “host diversity begets parasite diversity” is usually a reliable pattern, anthropogenic impacts are already starting to decouple these patterns (47). At the present moment, helminth richness

patterns could be functionally unknowable at the global scale. The same is likely true of many other groups of metazoan parasites that are far more poorly described.

## 6 The case for a Global Parasite Project

Given the extensive diversity of helminths, some researchers have argued in favor of abandoning the goal of ever fully measuring *or* cataloging parasite diversity, focusing instead on more “practical” problems. (23) At current rates of description, this is a reasonable outlook; even with several sources of unquantifiable error built into our estimates, it might seem impossible to make a dent within a generation. However, we dispute the idea that nothing can be done to accelerate parasite discovery. Funding and support for most scientific endeavors are at an unprecedented high in the 21<sup>st</sup> Century. Other scientific moonshots, from the Human Genome Project to the Event Horizon Telescope image of the M87 black hole, would have seemed impossible within living memory.

For parasitology, the nature and urgency of the problem call for a similarly unprecedented effort. For some purposes, the 5–15% of diversity described may be adequate to form and test ecoevolutionary hypotheses. But the reliability and accuracy of these data will become more uncertain in the face of global change, which will re-assemble host-parasite interactions on a scale that is nearly impossible to predict today. As climate change progresses, an increasing amount of our time and energy will be spent attempting to differentiate ecological signals from noise *and* anthropogenic signals. Though some consider the task of cataloging parasite diversity a “testimony to human inquisitiveness” (1), it is also a critical baseline for understanding biological interactions in a world on the brink of ecological collapse. Along the same lines of the Global Virome Project, we suggest that parasitology is ready for a “Global Parasite Project”: an internationally-coordinated effort to revolutionize the process of cataloging parasite diversity.

Although many parasitic clades would be worth including in a Global Parasite Project, helminths provide an invaluable model for several key points. First, modern methods make it possible to set realistic and tangible targets, and budget accordingly. Recently, the global parasite conservation plan (48) proposed an ambitious goal of describing 50% of parasite diversity in the next decade. From the bipartite rarefaction method (15; 14), we can back-estimate how many hosts we expect to randomly sample before we reach that target. For example, describing 50% of terrestrial nematode parasites would require sampling 3,215 new reptile host species, 2,560 birds, 2,325 amphibians, and only 995 mammals. These estimates assume diversity accumulates randomly, and hosts are sampled in an uninformed way. In practice, with knowledge about existing ecological and geographic biases, we can target sampling to accelerate species discovery, just as previous programs like the Planetary Biodiversity Inventory tapeworm project have, to great success. (35)

Second, any moonshot effort to describe parasite diversity would have to start with museums and collections. Systematics is the backbone of biodiversity science (49; 50), and especially in parasitology, collections are the backbone of systematics. (22; 51) They are also some of the most vulnerable research institutions in modern science: collections

are chronically underfunded and understaffed, sometimes to the point of dissolving. Even well-funded collections are still mostly undigitized, ungeoreferenced, and unsequenced (17), and massive volumes of “grey data” are unaccounted for in collections that are isolated from the global research community, or fall on opposite sides of deep historical divides (e.g., between Soviet and American science). In all likelihood, hundreds or thousands of parasite species have already been identified and are waiting to be described from museum backlogs, or their descriptions have been recorded in sources inaccessible due to digital access, language barriers, and paywalls. Technological advances in the coming decade—like faster bioinformatic pipelines for digitization, easier DNA extraction from formalin-fixed samples, or cryostorage of genomic-grade samples—will expand the possibilities of collections-based work, but are insufficient to fix many of the structural problems in the field.

Whereas the proposed Global Virome Project has focused mostly on capacity building for field sampling and labwork, a Global Parasite Project could probably achieve comparable rates of parasite description (on a lower budget) by focusing on collections science. If the existing research and funding model continues into the next decade, most “available” parasite data will be collected by Western scientists running field trips or long-term ecological monitoring programs that mostly feed into collections at their home institutions. Building out American and European parasite collections with globally-sourced specimens would only perpetuate existing data gaps and research inefficiencies, and the structural inequities and injustices they reflect. Increasingly, biomedical research is under legitimate scrutiny for parachute research—Western-driven research “partnerships” that leverage international project design for exploitative and extractive sampling, with little benefit to partners in the Global South (52; 53; 54). Though our hypothetical Global Parasite Project would be focused primarily on ecology, rather than biomedical or global health priorities, systematics and conservation are no exception to these conversations.

A Global Parasite Project, and its governance principles, would need to focus on supporting collections work and strengthening infrastructure around the world, with explicit priority on equity and local leadership. Recent developments in international law are particularly relevant to this end. (55) The Nagoya Protocol on Access to Genetic Resources and the Fair and Equitable Sharing of Benefits Arising from their Utilization to the Convention on Biological Diversity (Nagoya Protocol) establishes a regime to ensure that access to genetic resources—which some countries may define to include parasites—is coupled with the equitable sharing of benefits from their use. While implementation of the Nagoya Protocol varies between countries, it codifies important norms addressing injustices in obtaining parasites for collections, and inequities in the benefits arising directly or indirectly from their use, which may include capacity building, technology transfer, and recognition in scientific publications.

Done right, a Global Parasite Project would build resilient capacities for local priorities, through financial and technical support that empowers local researchers in resource-constrained settings. The support provided could include a combination of training, funding, conferences and meetings, and technology transfer. These can be identified

on a case-by-case basis to meet local priorities, which could include formalizing parasite collections, in cases where the component collections are distributed across departments; improving or modernizing specimen preservation methods or physical infrastructure; and digitizing and sequencing collections. (35; 56) Following these steps could fill major data gaps, and make collections around the world more resistant to damage, disasters, and gaps in research support. In turn, there is a wealth of local technical knowledge and expertise in countries where parasite collections are underserved. This is an opportunity for locally-led, multilateral capacity-building, and, where appropriate, dissemination of local knowledge to the broader scientific community with clear principles for locally-led publications and clear attribution. This work should expand avenues for parasitologists in the Global South to be recognized and engaged as active participants in the global research community.

Third, a Global Parasite Project would need to focus not just on completeness in parasite descriptions, but in host-parasite interaction data. The sparseness of existing network datasets can make estimates of affiliate diversity an order of magnitude more uncertain (14), and describing new parasites as fast as possible might make this problem more pronounced. An active effort needs to be made to fill in the 20-40% of missing links in association matrices, potentially using model-predicted links to optimize sampling (36). Better characterizing the full host-parasite network would have major benefits for actionable science, ranging from the triage process for parasite conservation assessments (48), to work exploring the apparently-emerging sylvatic niche of Guinea worm and its implications for disease eradication (57).

This is where ecologists fit best into a parasite moonshot. Rather than establishing an entirely novel global infrastructure for field research, we can fund a major expansion of parasitology in existing biodiversity inventories. The vast majority of animals already collected by field biologists have easily-documented symbionts, which are nevertheless neglected or discarded during sampling. In response, recent work has suggested widespread adoption of integrative protocols for how to collect and document the entire symbiont fauna of animal specimens. (58; 59) Building these protocols into more biodiversity inventories will help capture several groups of arthropod, helminth, protozoan, and fungal parasites, without unique or redundant sampling programs for each. In cases where destructive sampling is challenging (rare or elusive species) or prohibitive (endangered or protected species), nanopore sequencing and metagenomics may increasingly be used to fill sampling gaps. Collecting data these ways will improve detection of parasites' full host range, and allow researchers to explore emerging questions about how parasite metacommunities form and interact. (60) As novel biotic interactions form and are detected in real-time, this could become a major building block of global change research. (48)

Despite decades of work calling out the shortage of parasitologists and the "death" of systematics (61; 22), the vast diversity of undescribed parasites has never stopped the thousands of taxonomists and systematists who compiled our datasets over the last century—mostly without access to modern luxuries like digital collections or nanopore sequencing. A testimony to persistence and resourcefulness, these data provide the

roadmap for a new transformative effort to describe life on Earth. In an era of massive scientific endeavours, a coordinated effort to describe the world's parasite diversity seems more possible than ever. There may never be a Global Parasite Project *per se*, but the current moment may be the closest we've ever been to the "right time" to try for one. If biologists want to understand how the entire biosphere is responding to a period of unprecedented change, there is simply no alternative.

## Acknowledgements

Thanks to Shweta Bansal, Phil Staniczenko, and Joy Vaz for formative conversations, and to the Georgetown Environment Initiative for funding.

## 477 Materials and Methods

### 478 Data Assembly and Cleaning

479 The data we use in this study comes from two sources: the U.S. National Parasite Col-  
480 lection, and the London Natural History Museum’s host-parasite database. We describe  
481 the cleaning process for both of these sources in turn. All data, and all code, are available  
482 on Github at [github.com/cjcarlson/helminths](https://github.com/cjcarlson/helminths).

483 The U.S. National Parasite Collection has been housed at the Smithsonian National  
484 Museum of Natural History since 2013, and is one of the largest parasite collections in  
485 the world. The collection is largely digitized and has previously been used for global  
486 ecological studies. (5) We downloaded the collections database from EMu in September  
487 2017. The collection includes several major parasitic groups, not just helminths, and  
488 so we filtered data down to Acanthocephala, Nematoda, and Platyhelminthes. Meta-  
489 data associated with the collection has variable quality, and host information is mostly  
490 unstandardized, so we minimize its use here.

491 The London Natural History Museum’s host-parasite database is an association list  
492 for helminths and their host associations, dating back to the Host-Parasite Catalogue  
493 compiled by H.A. Baylis starting in 1922. The database itself is around 250,000 unique,  
494 mostly location-specific association records digitized from a reported 28,000 scientific  
495 studies. The NHM dataset has been used for ecological analysis in previous publications  
496 (6; 62; 63), but here we used an updated scrape of the online interface to the database.  
497 Whereas previous work has scraped association data by locality, we scraped by parasite  
498 species list from previous scrapes, allowing records without locality data to be included,  
499 and therefore including a more complete sample of hosts. The total raw dataset com-  
500 prised 100,370 host-parasite associations (no duplication by locality or other metadata),  
501 including 17,725 hosts and 21,115 parasites.

502 We cleaned the NHM data with a handful of validation steps. First, we removed  
503 all host and parasite species with no epithet (recorded as “*sp.*”), and removed all pre-  
504 revision name parentheticals. We then ran host taxonomy through ITIS with the help  
505 of the `taxize` package in R, and updated names where possible. This also allowed us  
506 to manually re-classify host names by taxonomic grouping. Parasite names were not  
507 validated because most parasitic groups are severely under-represented (or outdated) in  
508 taxonomic repositories like WORMS and ITIS. At present, no universal, reliable dataset  
509 exists for validating parasite taxonomy. After cleaning, there were a total of 13,162  
510 host species and 20,016 parasite species with a total of 73,273 unique interactions; this  
511 is compared to, in older scrapes, what would have been a processed total of 61,397  
512 interactions among 18,583 parasites and 11,749 hosts. We finally validated all terrestrial  
513 localities by updating to ISO3 standard, including island territories of countries like the  
514 United Kingdom; many localities stored in the NHM data predate the fall of the USSR  
515 or are have similar anachronisms.



## 516 Trends over Time

### 517 Description rates

518 In the NHM data, we assigned dates of description by extracting year from the full  
 519 taxonomic record of any given species (e.g., *Ascaris lumbricoides* Linnaeus, 1758) using  
 520 regular expressions; in the USNPC data, we extracted year from the accession date  
 521 recorded for a given specimen. We added together the total number of species described  
 522 (NHM) and collected (USNPC) and fit a break-point regression using the `segmented`  
 523 package for R. (64)

### 524 Body size

525 We examined trends in body size of hosts and parasites over time using the date of  
 526 description given in the NHM dataset. For parasite body size, we used a recently-  
 527 published database of trait information for acanthocephalans, cestodes, and nematodes  
 528 (65), and recorded the adult stage body length for all species present in the NHM dataset.  
 529 For host body size, we subsetting associations to mammals with body mass information  
 530 in PanTHERIA (66). We examined trends in worm length and host mass over time  
 531 using generalized additive models (GAMs) with a smoothed fixed effect for year, using  
 532 the `mgcv` package in R. (67)

### 533 Host specificity

534 To test for a description bias in host specificity, we identified the year of description  
 535 from every species in the NHM data, and coded for each species whether or not they  
 536 were the first species recorded in the genus. We compared host range for first and non-  
 537 first taxa and tested for a difference with a Wilcoxon test (chosen given the non-normal  
 538 distribution of host specificity). To test for temporal trends in host specificity, we fit  
 539 two GAM models with host specificity regressed against a single smoothed fixed effect  
 540 for time. In the first, we used the year of species description in the NHM data; in the  
 541 second, we recorded the year of first accession in the USNPC.

### 542 Estimating Species Richness

543 Strona and Fattorini (15) discovered that subsampling the host-helminth network pro-  
 544 duces an approximately power-law scaling pattern, leading to massively reduced richness  
 545 estimates compared to Dobson *et al.* (1). This pattern was recently found by Carlson  
 546 *et al.* (14) to be general across large bipartite networks, who developed the R package  
 547 `codependent` (34) as a tool for fitting these curves and extrapolating symbiont richness.  
 548 We used the cleaned host-helminth network and `codependent` to fit curves for each of  
 549 twenty groups, and extrapolate to independent richness estimates for all host groups.  
 550 We sourced the estimate of every terrestrial group's diversity from the 2014 IUCN Red  
 551 List estimates. Fish were split into bony and cartilaginous fish in the same style as

552 Dobson *et al.* (1), but because they have much poorer consolidated species lists, we used  
553 estimates of known richness from a fish biology textbook. (68)

554 The software also allows generation of 95% confidence intervals generated procedu-  
555 rally from the fitting of the networks, and while we have used these in previous work  
556 (14), here we elected not to. In our assessment, the epistemic uncertainty around cryptic  
557 species, the percent of documented links, and even basic choices like the number of bony  
558 fish far outweigh the uncertainty of the model fit for the power law curves.

559 One major methodological difference between Carlson *et al.* (14) and our study is  
560 that in their study, they back-corrected estimates by the proportion of viruses described  
561 for the hosts in their network (via validation on independent metagenomic datasets).  
562 We have no confident way to evaluate how comprehensive the NHM dataset is, as it is  
563 certainly the largest dataset available describing host-helminth interactions, and widely  
564 believed to be one of the most thorough. (6) Consequently, our estimates account for  
565 the proportion of undescribed diversity due only to unsampled hosts, and underesti-  
566 mates by assuming all recorded hosts have no undescribed parasites. This error is likely  
567 overcorrected by the back of the envelope correction we perform for cryptic richness.

## 568 Estimating Total Richness Across Host Groups

569 The overall number of parasites for all orders considered is smaller than the sum of  
570 estimates for each order, as some parasites would be expected to infect vertebrates from  
571 more than one order. Here we present a new mathematical approach to correcting  
572 richness estimates for affiliates across multiple groups, based on the inclusion-exclusion  
573 principle.

## 574 Inclusion-Exclusion Principle

575 The inclusion-exclusion principle from set theory allows us to count the number of ele-  
576 ments in the union of two or more sets, ensuring that each element is counted only once.  
577 For two sets, it is expressed as follows:

$$|A \cup B| = |A| + |B| - |A \cap B|$$

Where  $|A \cup B|$  is the number of elements in the union of the set,  $|A|$  and  $|B|$  are the  
number of elements in A and B, respectively, and  $|A \cap B|$  is number of elements in both  
A and B. For three sets, it is expressed as follows:

$$|A \cup B \cup C| = |A| + |B| + |C| - |A \cap B| - |A \cap C| - |B \cap C| + |A \cap B \cap C|$$

578 For a greater number of sets, the pattern continues, with elements overlapping an even  
579 number of sets subtracted, and elements overlapping an odd number of sets added.

## 580 Inclusion-Exclusion and Parasite Estimates

581 The overall estimated number of parasites of two groups,  $\hat{N}$ , is given as the expected  
582 size of  $|N_1^{est} \cup N_2^{est}|$ . Adapting the inclusion-exclusion principle, we can assume that  
583 the overlap between groups  $N_1$  and  $N_2$  in collections is similar to the overlap of not yet  
584 discovered parasites:

$$\begin{aligned}\hat{N} &= E(|N_1^{est} \cup N_2^{est}|) \\ &= N_1^{est} + N_2^{est} - \left( \frac{|N_1 \cap N_2|}{|N_1|} * N_1^{est} + \frac{|N_1 \cap N_2|}{|N_2|} * N_2^{est} \right)\end{aligned}$$

585 We average the estimated number in both groups over  $N_1^{est}$  and  $N_2^{est}$ , rather than just  
586 scaling by  $|N_1 \cap N_2|/(N_1 + N_2)$ , because we cannot be sure that  $N_1^{est}$  and  $N_2^{est}$  scale with  
587  $N_1$  and  $N_2$  roughly proportionally. (For example, we estimated that the description rate  
588 of mammal trematodes is almost an order of magnitude higher than in reptiles.) Instead  
589 of estimating the average overlap for a given total number, we estimate the number of  
590 multi-order parasites for a given order's count, and average that across the groups.

591 For  $h$  orders, this can be generalized as follows:

$$\begin{aligned}\hat{N} &= E\left(\left|\bigcup_{i=1}^h N_i^{est}\right|\right) \\ &= \sum_{i=1}^h N_i^{est} - \sum_{1 \leq i < j \leq h} |N_i \cap N_j| \left( \frac{N_i^{est}}{|N_i|} + \frac{N_j^{est}}{|N_j|} \right) \\ &\quad + \sum_{1 \leq i < j < k \leq h} |N_i \cap N_j \cap N_k| \left( \frac{N_i^{est}}{|N_i|} + \frac{N_j^{est}}{|N_j|} + \frac{N_k^{est}}{|N_k|} \right) \\ &\quad - \dots + (-1)^{h-1} |N_1 \cap \dots \cap N_h| \left( \frac{N_1^{est}}{|N_1|} + \dots + \frac{N_h^{est}}{|N_h|} \right)\end{aligned}$$

592 We provide a new implementation of this approach with the `multigroup` function in an  
593 update to the R package `codependent`.

## 594 Mapping Potential Richness

595 To map species richness, we used the IUCN range maps for mammals, and counted the  
596 number of mammals overlapping each country. Using mammal richness for each coun-  
597 try, we predicted the expected number of parasitic associations those species should have  
598 globally, running models separately by parasite group (acanthocephalans, cestodes, ne-

599 matodes, and trematodes), and totalled these. We call these “possible” associations and  
600 not expected richness, for two reasons: (1) Most macroparasites, especially helminths,  
601 are not found everywhere their hosts are found. (2) Host specificity may vary globally  
602 (69), but as we stress in the main text, it is difficult to disentangle our knowledge of  
603 macroecological patterns from the massive undersampling of parasites in most countries.  
604 We compared patterns of possible richness against known helminth associations recorded  
605 in a given country, the grounds on which parasite richness has previously been mapped.  
606 (6) Finally, we mapped the percentage of total possible unrecorded interactions (an up-  
607 per bound for high values, except when 100% is reported, indicating that no parasites  
608 have been recorded in the NHM data from a country).

## 609 Figures and Tables

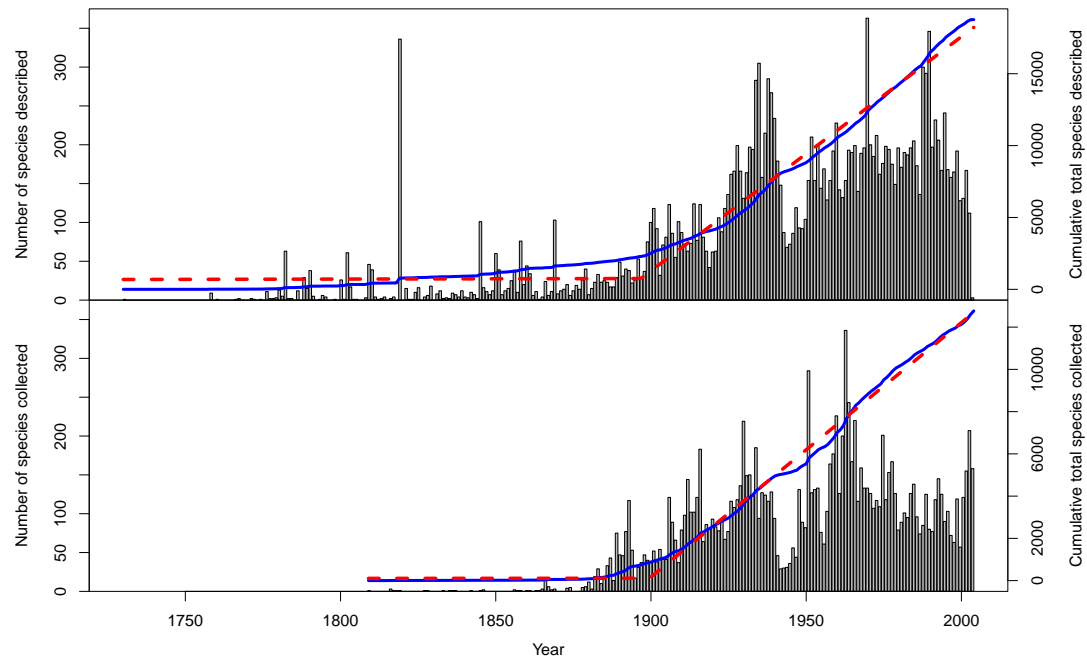

Figure 1: Rates of helminth descriptions (top, from NHM data) and collections (bottom, from the USNPC). Blue trends indicate cumulative totals, and red lines give a breakpoint regression with a single breakpoint (1912 for the NHM data, 1903 for the USNPC data). Although the current trend appears to be leveling off, it is unlikely this indicates a saturating process (as comparably illustrated by the drop in sampling during the Second World War, 1940-1945).

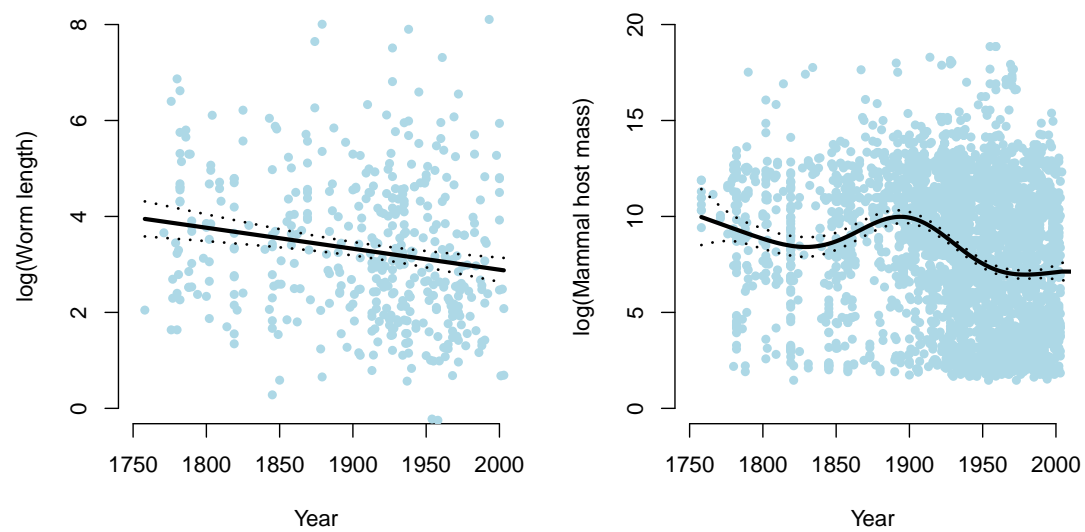

Figure 2: We found evidence of weak but highly significant declines over time in parasite adult body length (left; smooth term  $p = 0.0003$ ) and host body size across known host associations (right; smooth term  $p < 0.0001$ ). This confirms a mild description bias for larger parasites in larger hosts.



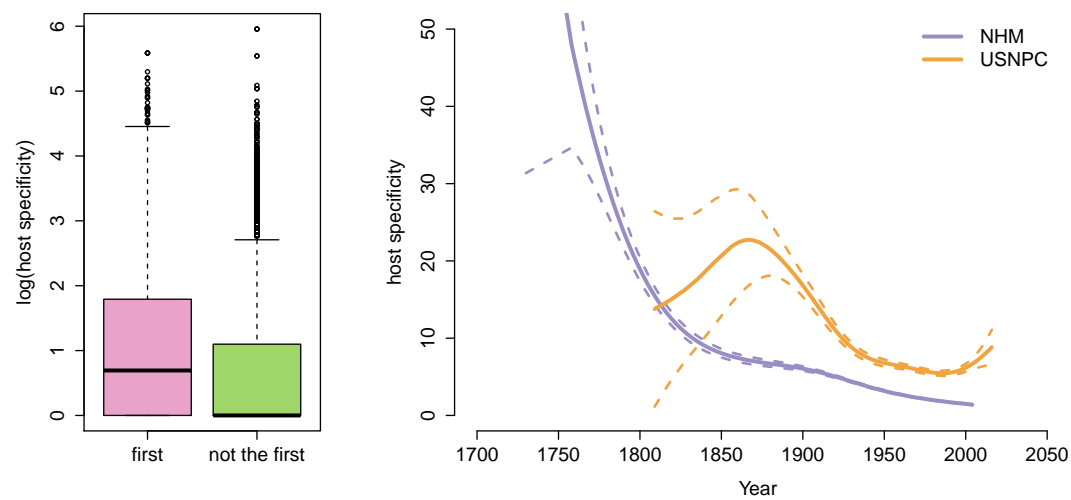

Figure 3: The type species (the first described in a genus) has a statistically significantly higher average host specificity than those that follow. Parasites described earlier typically have a higher degree of generalism, especially prior to the 1840s; specimens collected after roughly the 1870s also apparently tend towards more host-specific species than those from older collections. (Curves are generalized additive models fit assuming a negative binominal distribution, with dashed lines for the 95% confidence bounds.)

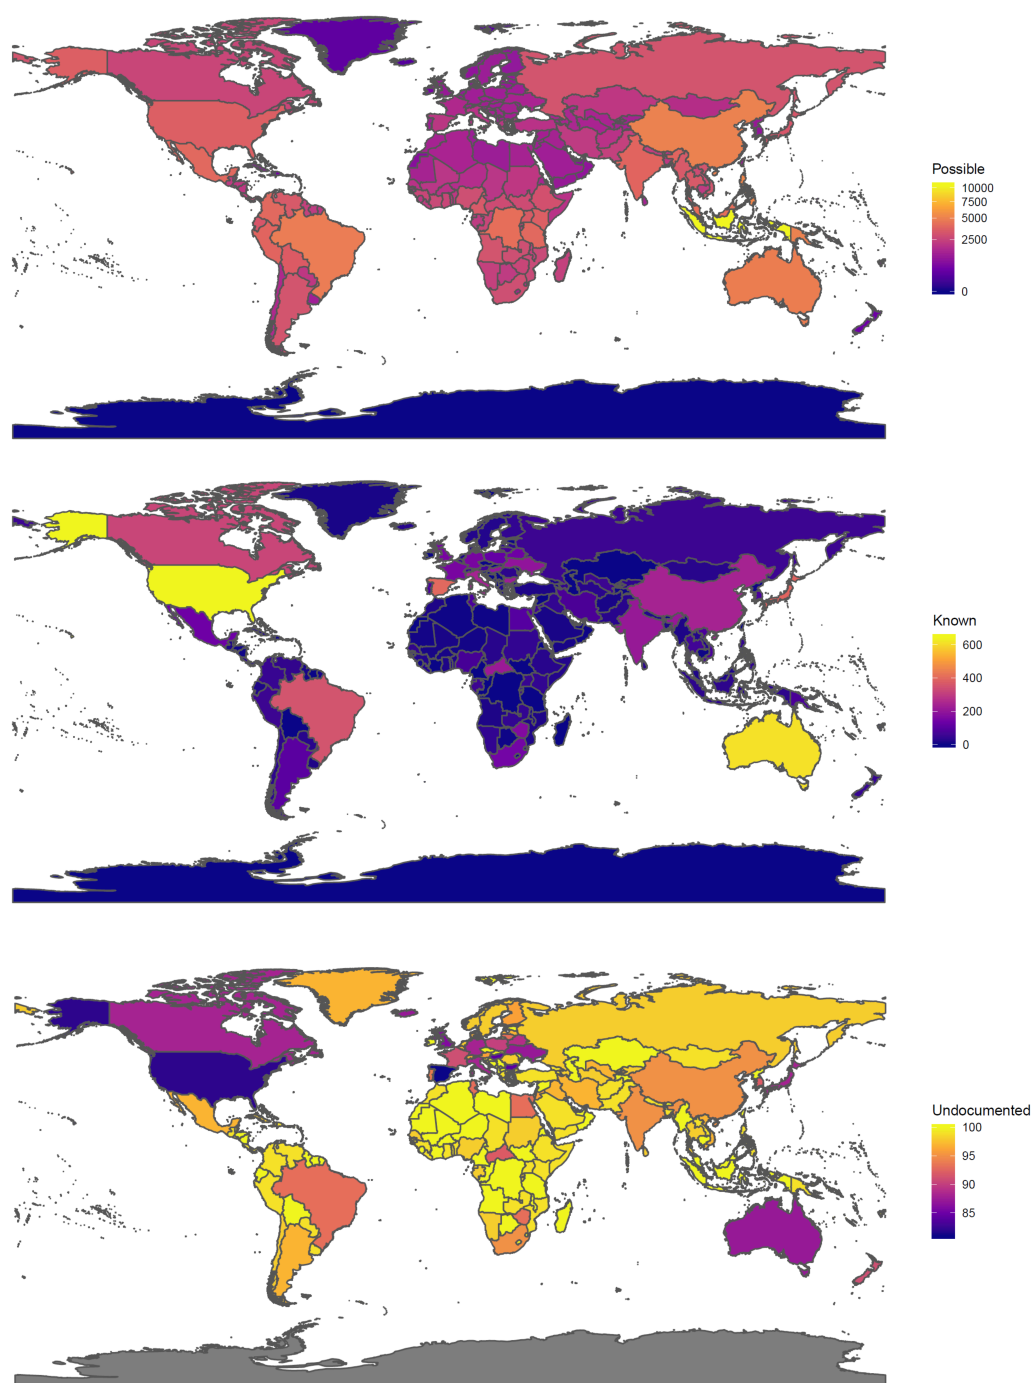

Figure 4: The distribution of maximum possible helminth richness in mammals (top), the number of known helminth parasites of mammals as recorded by country in the NHM data (middle), and the maximum percentage of undocumented helminth fauna by country (bottom).

|                | Chondrichthyes | Osteichthyes    | Amphibia       | Reptilia       | Aves            | Mammalia        | Total            |
|----------------|----------------|-----------------|----------------|----------------|-----------------|-----------------|------------------|
| Acanthocephala | 169<br>(4%)    | 3,572<br>(13%)  | 765<br>(3%)    | 785<br>(4%)    | 1,184<br>(14%)  | 886<br>(12%)    | 6,223<br>(11%)   |
| Cestoda        | 2,108<br>(28%) | 5,875<br>(12%)  | 637<br>(5%)    | 2,153<br>(5%)  | 10,257<br>(14%) | 4,061<br>(26%)  | 23,749<br>(16%)  |
| Nematoda       | 566<br>(14%)   | 10,712<br>(11%) | 2,148<br>(10%) | 4,537<br>(12%) | 3,925<br>(19%)  | 7,902<br>(30%)  | 28,844<br>(17%)  |
| Trematoda      | 391<br>(16%)   | 17,745<br>(19%) | 3,700<br>(6%)  | 12,153<br>(4%) | 8,778<br>(17%)  | 4,550<br>(23%)  | 44,262<br>(14%)  |
| Total          | 3,234<br>(23%) | 37,904<br>(15%) | 7,250<br>(7%)  | 19,628<br>(6%) | 24,144<br>(16%) | 17,399<br>(26%) | 103,078<br>(15%) |

Table 1: Helminth diversity, re-estimated: How many helminth species (top), and what percentage of species have been described (bottom)?

## References

- [1] Dobson, A., Lafferty, K. D., Kuris, A. M., Hechinger, R. F. & Jetz, W. Homage to Linnaeus: how many parasites? How many hosts? *Proceedings of the National Academy of Sciences* **105**, 11482–11489 (2008).
- [2] Larsen, B. B., Miller, E. C., Rhodes, M. K. & Wiens, J. J. Inordinate fondness multiplied and redistributed: the number of species on earth and the new pie of life. *The Quarterly Review of Biology* **92**, 229–265 (2017).
- [3] Rohde, K. *Ecology of marine parasites*. (University of Queensland Press, 1982).
- [4] Okamura, B., Hartigan, A. & Naldoni, J. Extensive uncharted biodiversity: the parasite dimension. *Integrative and Comparative Biology* **58**, 1132–1145 (2018).
- [5] Carlson, C. J. *et al.* Parasite biodiversity faces extinction and redistribution in a changing climate. *Science Advances* **3**, e1602422 (2017).
- [6] Dallas, T. A. *et al.* Gauging support for macroecological patterns in helminth parasites. *Global Ecology and Biogeography* **27**, 1437–1447 (2018).
- [7] Han, B. A., Kramer, A. M. & Drake, J. M. Global patterns of zoonotic disease in mammals. *Trends in Parasitology* **32**, 565–577 (2016).
- [8] Dougherty, E. R. *et al.* Paradigms for parasite conservation. *Conservation Biology* **30**, 724–733 (2016).
- [9] Cizauskas, C. A. *et al.* Parasite vulnerability to climate change: an evidence-based functional trait approach. *Royal Society Open Science* **4**, 160535 (2017).
- [10] Han, B. A., Schmidt, J. P., Bowden, S. E. & Drake, J. M. Rodent reservoirs of future zoonotic diseases. *Proceedings of the National Academy of Sciences* **112**, 7039–7044 (2015).
- [11] Han, B. A. *et al.* Undiscovered bat hosts of filoviruses. *PLoS Neglected Tropical Diseases* **10**, e0004815 (2016).
- [12] Olival, K. J. *et al.* Host and viral traits predict zoonotic spillover from mammals. *Nature* **546**, 646–650 (2017).
- [13] Carroll, D. *et al.* The Global Virome Project. *Science* **359**, 872–874 (2018).
- [14] Carlson, C. J., Zipfel, C. M., Garnier, R. & Bansal, S. Global estimates of mammalian viral biodiversity accounting for host sharing. *Nature Ecology and Evolution* doi: 10.1038/s41559-019-0910-6 (2019).
- [15] Strona, G. & Fattorini, S. Parasitic worms: how many really? *International Journal for Parasitology* **44**, 269–272 (2014).

- 643 [16] Schilthuizen, M., Vairappan, C. S., Slade, E. M., Mann, D. J. & Miller, J. A.  
644 Specimens as primary data: museums and ‘open science’. *Trends in Ecology and*  
645 *Evolution* **30**, 237–238 (2015).
- 646 [17] Bell, K. C., Carlson, C. J. & Phillips, A. J. Parasite collections: overlooked re-  
647 sources for integrative research and conservation. *Trends in Parasitology* **34**, 637–  
648 639 (2018).
- 649 [18] DiEuliis, D., Johnson, K. R., Morse, S. S. & Schindell, D. E. Opinion: Specimen col-  
650 lections should have a much bigger role in infectious disease research and response.  
651 *Proceedings of the National Academy of Sciences* **113**, 4–7 (2016).
- 652 [19] Gibson, D., Bray, R. & Harris, E. Host-parasite database of the Natural History  
653 Museum, London (2005).
- 654 [20] Dallas, T. helminthR: an R interface to the London Natural History Museum’s  
655 host–parasite database. *Ecography* **39**, 391–393 (2016).
- 656 [21] Lichtenfels, J. Methods for conserving, storing, and studying helminths in the US  
657 National Parasite Collection. *Systematic Parasitology* **6**, 250–251 (1984).
- 658 [22] Brooks, D. R. & Hoberg, E. P. Parasite systematics in the 21st century: opportu-  
659 nities and obstacles. *Trends in Parasitology* **17**, 273–275 (2001).
- 660 [23] Poulin, R. Parasite biodiversity revisited: frontiers and constraints. *International*  
661 *Journal for Parasitology* **44**, 581–589 (2014).
- 662 [24] Costello, M. J. Parasite rates of discovery, global species richness and host speci-  
663 ficity. *Integrative and Comparative Biology* **56**, 588–599 (2016).
- 664 [25] Jorge, F. & Poulin, R. Poor geographical match between the distributions of host  
665 diversity and parasite discovery effort. *Proceedings of the Royal Society of London*  
666 *B* **285**, 20180072 (2018).
- 667 [26] Poulin, R. & Jorge, F. The geography of parasite discovery across taxa and over  
668 time. *Parasitology* **146**, 168–175 (2019).
- 669 [27] Clark, N. J. Phylogenetic uniqueness, not latitude, explains the diversity of avian  
670 blood parasite communities worldwide. *Global Ecology and Biogeography* **27**, 744–  
671 755 (2018).
- 672 [28] Preisser, W. Latitudinal gradients of parasite richness: a review and new insights  
673 from helminths of cricetid rodents. *Ecography* (2019).
- 674 [29] Strona, G. & Fattorini, S. A few good reasons why species-area relationships do not  
675 work for parasites. *BioMed Research International* **2014**, 271680–271680 (2014).
- 676 [30] Poulin, R. & Morand, S. *Parasite biodiversity* (Smithsonian Institution, 2004).

- 677 [31] Jones, O. R., Purvis, A., Baumgart, E. & Quicke, D. L. Using taxonomic revision  
678 data to estimate the geographic and taxonomic distribution of undescribed species  
679 richness in the braconidae (Hymenoptera: Ichneumonoidea). *Insect Conservation*  
680 *and Diversity* **2**, 204–212 (2009).
- 681 [32] Kamiya, T., O’dwyer, K., Nakagawa, S. & Poulin, R. Host diversity drives parasite  
682 diversity: meta-analytical insights into patterns and causal mechanisms. *Ecography*  
683 **37**, 689–697 (2014).
- 684 [33] Kamiya, T., O’dwyer, K., Nakagawa, S. & Poulin, R. What determines species  
685 richness of parasitic organisms? a meta-analysis across animal, plant and fungal  
686 hosts. *Biological Reviews* **89**, 123–134 (2014).
- 687 [34] Carlson, C. J. `codependent` R package. version 1.1 (2019). URL  
688 <https://github.com/cjcarlson/codependent>.
- 689 [35] Caira, J. N. & Jensen, K. *Planetary biodiversity inventory (2008–2017): Tapeworms*  
690 *from vertebrate bowels of the earth* (Natural History Museum, University of Kansas,  
691 2017).
- 692 [36] Dallas, T., Huang, S., Numm, C., Park, A. W. & Drake, J. M. Estimating parasite  
693 host range. *Proceedings of the Royal Society of London B* **284**, 20171250 (2017).
- 694 [37] Poulin, R. Uneven distribution of cryptic diversity among higher taxa of parasitic  
695 worms. *Biology Letters* **7**, 241–244 (2011).
- 696 [38] de León, G. P.-P. & Poulin, R. An updated look at the uneven distribution of  
697 cryptic diversity among parasitic helminths. *Journal of Helminthology* **92**, 197–202  
698 (2018).
- 699 [39] Martin, L. J., Blossey, B. & Ellis, E. Mapping where ecologists work: biases in the  
700 global distribution of terrestrial ecological observations. *Frontiers in Ecology and*  
701 *the Environment* **10**, 195–201 (2012).
- 702 [40] Smit, N., Basson, L., Vanhove, M. P. & Scholz, T. History of fish parasitology in  
703 africa (2018).
- 704 [41] Caira, J. The american society of parasitologists: Who are we now? *Journal of*  
705 *Parasitology* **97**, 967–973 (2011).
- 706 [42] Quicke, D. L. We know too little about parasitoid wasp distributions to draw any  
707 conclusions about latitudinal trends in species richness, body size and biology. *PLoS*  
708 *One* **7**, e32101 (2012).
- 709 [43] Dolphin, K. & Quicke, D. L. Estimating the global species richness of an incom-  
710 pletely described taxon: an example using parasitoid wasps (Hymenoptera: Bra-  
711 conidae). *Biological Journal of the Linnean Society* **73**, 279–286 (2001).



- 712 [44] Santos, A. M. & Quicke, D. L. Large-scale diversity patterns of parasitoid insects.  
713 *Entomological Science* **14**, 371–382 (2011).
- 714 [45] Stephens, P. R. *et al.* The macroecology of infectious diseases: a new perspective  
715 on global-scale drivers of pathogen distributions and impacts. *Ecology Letters* **19**,  
716 1159–1171 (2016).
- 717 [46] Nunn, C. L., Altizer, S. M., Sechrest, W. & Cunningham, A. A. Latitudinal gra-  
718 dients of parasite species richness in primates. *Diversity and Distributions* **11**,  
719 249–256 (2005).
- 720 [47] Wood, C. L. *et al.* Human impacts decouple a fundamental ecological relation-  
721 ship—the positive association between host diversity and parasite diversity. *Global*  
722 *Change Biology* **24**, 3666–3679 (2018).
- 723 [48] Carlson, C. J. *et al.* A global plan for parasite conservation. *Biological Conservation*  
724 in review (2020).
- 725 [49] Littlewood, D. Systematics as a cornerstone of parasitology: overview and preface.  
726 *Parasitology* **138**, 1633–1637 (2011).
- 727 [50] Monis, P. Invited review the importance of systematics in parasitological research.  
728 *International Journal for Parasitology* **29**, 381–388 (1999).
- 729 [51] Hoberg, E. P. Foundations for an integrative parasitology: collections, archives,  
730 and biodiversity informatics. *Comparative Parasitology* **69**, 124–132 (2002).
- 731 [52] Yozwiak, N. L. *et al.* Roots, not parachutes: research collaborations combat out-  
732 breaks. *Cell* **166**, 5–8 (2016).
- 733 [53] Health, T. L. G. Closing the door on parachutes and parasites. *The Lancet Global*  
734 *health* **6**, e593 (2018).
- 735 [54] Serwadda, D., Ndebele, P., Grabowski, M. K., Bajunirwe, F. & Wanyenze, R. K.  
736 Open data sharing and the global south—who benefits? *Science* **359**, 642–643  
737 (2018).
- 738 [55] Prathapan, K. & Rajan, P. D. Advancing taxonomy in the global south and com-  
739 pleting the grand linnaean enterprise. *Megataxa* **1**, 73–77 (2020).
- 740 [56] Janzen, D. H. Now is the time. *Philosophical Transactions of the Royal Society of*  
741 *London. Series B: Biological Sciences* **359**, 731–732 (2004).
- 742 [57] Thiele, E. A. *et al.* Population genetic analysis of chadian guinea worms reveals that  
743 human and non-human hosts share common parasite populations. *PLoS neglected*  
744 *tropical diseases* **12**, e0006747 (2018).

- 745 [58] Cook, J. A. *et al.* Transformational principles for neon sampling of mammalian  
746 parasites and pathogens: A response to springer and colleagues. *BioScience* **66**,  
747 917–919 (2016).
- 748 [59] Galbreath, K. E. *et al.* Building an integrated infrastructure for exploring biodiver-  
749 sity: field collections and archives of mammals and parasites. *Journal of Mammalogy*  
750 **100**, 382–393 (2019).
- 751 [60] Dallas, T. A., Laine, A.-L. & Ovaskainen, O. Detecting parasite associations within  
752 multi-species host and parasite communities. *Proceedings of the Royal Society B*  
753 **286**, 20191109 (2019).
- 754 [61] Mariaux, J. Cestode systematics: any progress? *International Journal for Para-*  
755 *sitology* **26**, 231–243 (1996).
- 756 [62] Dallas, T., Park, A. W. & Drake, J. M. Predictability of helminth parasite host  
757 range using information on geography, host traits and parasite community structure.  
758 *Parasitology* **144**, 200–205 (2017).
- 759 [63] Dallas, T. *et al.* Contrasting latitudinal gradients of body size in helminth parasites  
760 and their hosts. *Global Ecology and Biogeography* **28**, 804–813 (2019).
- 761 [64] Muggeo, V. M. & Muggeo, M. V. M. Package ‘segmented’. *Biometrika* **58**, 516  
762 (2017).
- 763 [65] Benesh, D. P., Lafferty, K. D. & Kuris, A. A life cycle database for parasitic  
764 acanthocephalans, cestodes, and nematodes. *Ecology* **98**, 882–882 (2017).
- 765 [66] Jones, K. E. *et al.* Pantheria: a species-level database of life history, ecology, and  
766 geography of extant and recently extinct mammals: Ecological archives e090-184.  
767 *Ecology* **90**, 2648–2648 (2009).
- 768 [67] Wood, S. N. mgcv: GAMs and generalized ridge regression for R. *R news* **1**, 20–25  
769 (2001).
- 770 [68] Nelson, J. S. *Fishes of the World, 4th edition* (John Wiley & Sons, 2006).
- 771 [69] Wells, K., Gibson, D. I. & Clark, N. J. Global patterns in helminth host speci-  
772 ficity: phylogenetic and functional diversity of regional host species pools matter.  
773 *Ecography* **42**, 416–427 (2019).
